# Supplementary material for: Preventive effect of ethanol extract from Chinese sumac fruits against tetrachloromethane-induced liver fibrosis in mice
Source: Royal Society of Chemistry journal article supplement (doi:10.1039/d0fo00548g), 2020-01-01
Supplement: d0fo00548g1.pdf [file d0fo00548g1.pdf]

## **SUPPORTING INFORMATION**

### **Preventive effect of ethanol extract from Chinese sumac fruits against tetrachloromethane-induced liver fibrosis in mice**

Jiexin Zhou, Xiaojing Liu, Taiming Chen, Guiguang Cheng, Shengbao Cai\*

Faculty of Agriculture and Food, Yunnan Institute of Food Safety, Kunming  
University of Science and Technology, Kunming, Yunnan Province, People's  
Republic of China, 650500;

#### **\* Corresponding author and proofs**

Shengbao Cai

E-mail address: caikmust2013@163.com, +86-18087555458

**Fig. S1 Negative ion current chromatogram of ethanol extract of Chinese sumac fruits. Peaks identification and their MS data are shown in Table S1.**

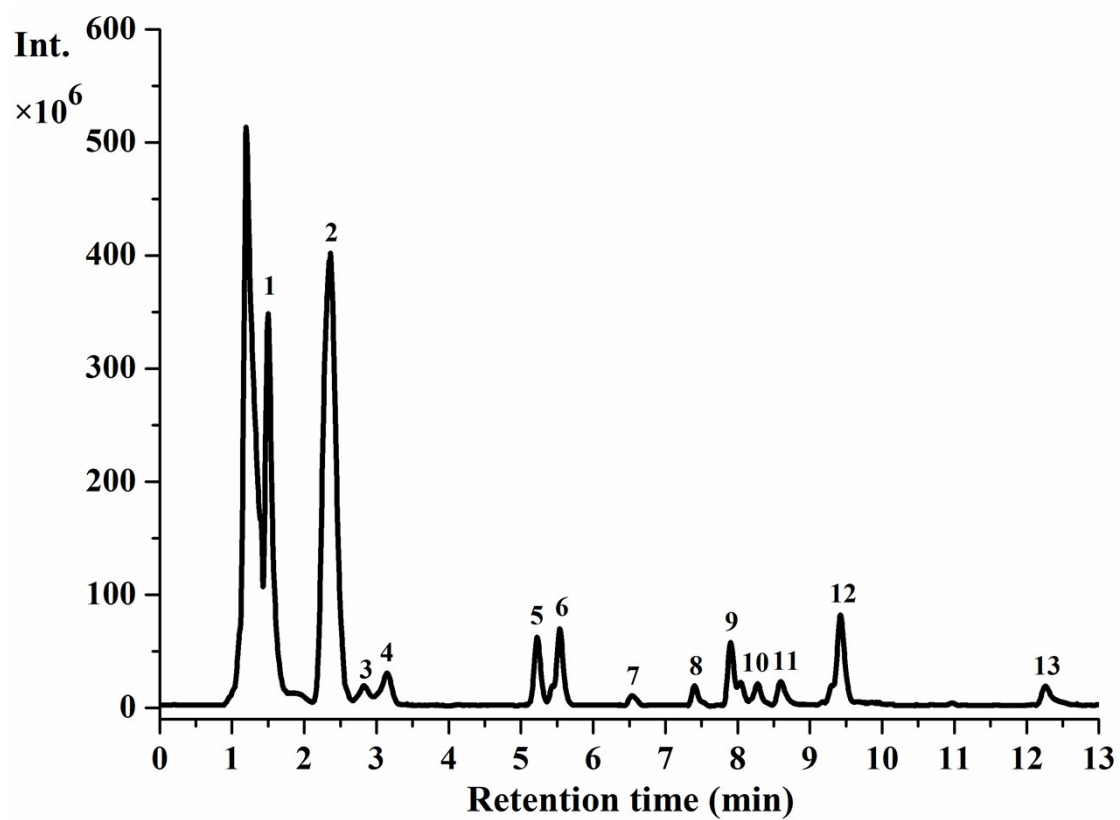

**Table S1** Phenolic compounds identified in Chinese sumac fruit by UHPLC-ESI-HRMS/MS in negative mode.

| Peak No. | Compounds                                | Molecular formula                               | Retention time (min) | [M-H] <sup>-</sup> ( <i>m/z</i> ) | MS/MS ion fragments           |
|----------|------------------------------------------|-------------------------------------------------|----------------------|-----------------------------------|-------------------------------|
| 1        | Citric acid                              | C <sub>6</sub> H <sub>8</sub> O <sub>7</sub>    | 1.50                 | 191.0194                          | 57.0333, 87.0076, 111.0077    |
| 2        | Gallic acid                              | C <sub>7</sub> H <sub>6</sub> O <sub>5</sub>    | 2.36                 | 169.0137                          | 69.0333, 97.0284, 125.0235    |
| 3        | Di- <i>O</i> -galloyl-glucoside          | C <sub>20</sub> H <sub>20</sub> O <sub>14</sub> | 2.82                 | 483.0794                          | 125.0235, 169.0137, 331.0679  |
| 4        | Di- <i>O</i> -galloyl-glucoside (isomer) | C <sub>20</sub> H <sub>20</sub> O <sub>14</sub> | 3.15                 | 483.0793                          | 125.0235, 169.0137, 331.0679  |
| 5        | Trigalloylglucose                        | C <sub>27</sub> H <sub>24</sub> O <sub>18</sub> | 5.23                 | 635.0909                          | 169.0137, 483.0795, 635.0911  |
| 6        | Trigalloylglucose (isomer)               | C <sub>27</sub> H <sub>24</sub> O <sub>18</sub> | 5.54                 | 635.0909                          | 169.0137, 483.0795, 635.0911  |
| 7        | Myricetin-3- <i>O</i> -galactoside       | C <sub>21</sub> H <sub>20</sub> O <sub>13</sub> | 6.54                 | 479.0845                          | 316.0232, 317.0307            |
| 8        | Myricetin-3- <i>O</i> -rhamnoside        | C <sub>21</sub> H <sub>20</sub> O <sub>12</sub> | 7.40                 | 463.0896                          | 271.0266, 300.0282, 316.0232  |
| 9        | Luteolin-7- <i>O</i> -glucoside          | C <sub>21</sub> H <sub>20</sub> O <sub>11</sub> | 7.90                 | 447.0945                          | 284.0333, 285.0410            |
| 10       | Valoneic acid dilactone                  | C <sub>21</sub> H <sub>10</sub> O <sub>13</sub> | 8.24                 | 469.0530                          | 125.0235, 169.0137            |
| 11       | Quercetin-3- <i>O</i> -arabinoside       | C <sub>20</sub> H <sub>18</sub> O <sub>11</sub> | 8.60                 | 433.0787                          | 271.0255, 300.0282            |
| 12       | Quercetin-3- <i>O</i> -rhamnoside        | C <sub>21</sub> H <sub>20</sub> O <sub>11</sub> | 9.43                 | 447.0945                          | 284.0333, 285.0412, 300.0283, |
| 13       | Kaempferol-3- <i>O</i> -hexoside         | C <sub>21</sub> H <sub>20</sub> O <sub>10</sub> | 12.26                | 431.0995                          | 255.0303, 284.0333            |

**Table S2** The sequences of gene primers used in this study

|                | Forward primer (5'-3')    | Reverse primer (5'-3') |
|----------------|---------------------------|------------------------|
| TNF- $\alpha$  | AGGGTCTGGGCCATAGAACT      | CCACCACGCTCTTCTGTCTAC  |
| TGF- $\beta$ 1 | CAATTCCTGGCGTTACCTTG      | AAAGCCCTGTATTCCGTCTC   |
| Bax            | GATCAGCTCGGGCACTTT AG     | TTGCTGATGGCAACTTCAAC   |
| Bcl-2          | CTTTCTGCTTTTTATTTTCATGAGG | CAGAAGATCATGCCGTCCTT   |
| GAPDH          | TGGGCAAGGTCATCCCAGAG      | GAGGCCATGTAGGCCATGAG   |

TNF- $\alpha$ : tumor necrosis factor- $\alpha$ ; TGF- $\beta$ 1: transforming growth factor- $\beta$ 1; Bax: Bcl-2-associated X protein; Bcl-2: B cell lymphoma-2; GAPDH: glyceraldehyde-3-phosphate dehydrogenase
